# Supplementary figures and images for: Fabrication and gas sensitivity in heterostructures of ortho-chloropolyaniline–ZnO nanocomposites
Source: Royal Society of Chemistry journal article supplement (doi:10.1039/c4ra02503b), 2014-01-01

Supplementary data

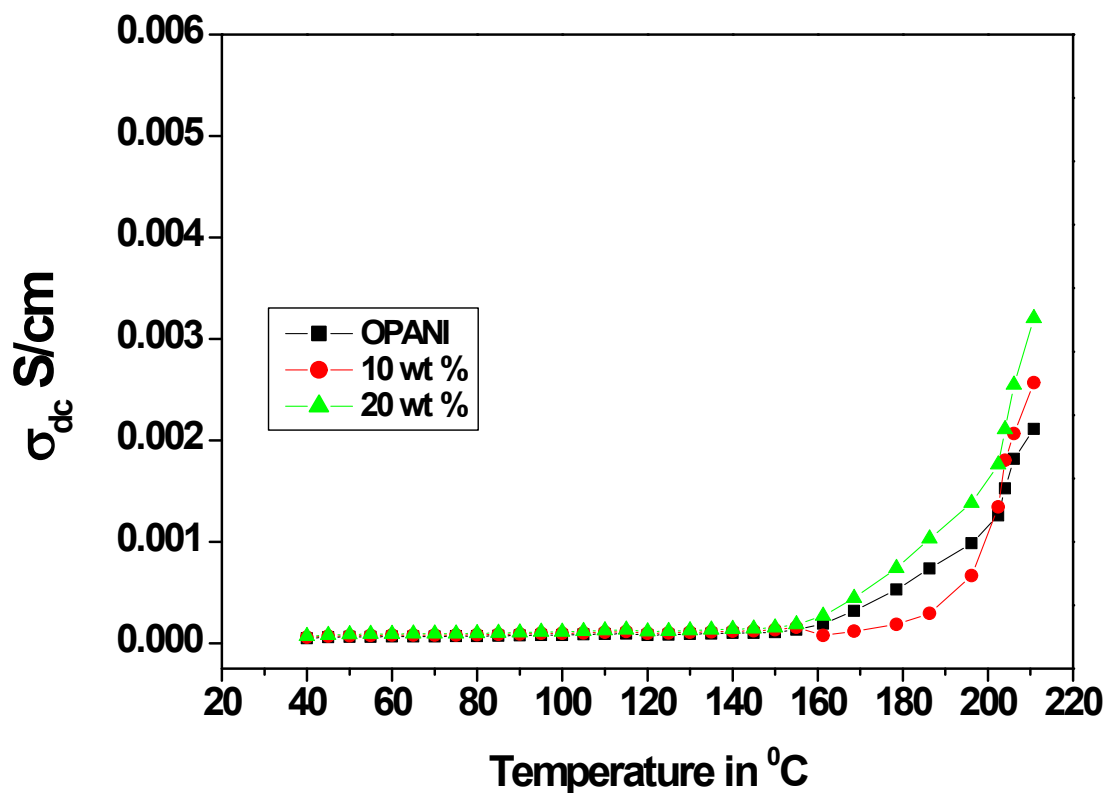

Figure 6 DC Conductivity of OPANI and OPANI / ZnO Nanocomposites (10 & 20 wt %)

Supplement: c4ra02503b1.pdf [file c4ra02503b1.pdf]
